# Supplementary material for: Electrochemical performances of LiMnPO4 synthesized from non-stoichiometric Li/Mn ratio
Source: Royal Society of Chemistry journal article supplement (doi:10.1039/c1cp22658d), 2011-01-01
Supplement: c1cp22658d.pdf [file c1cp22658d.pdf]

Supporting Information

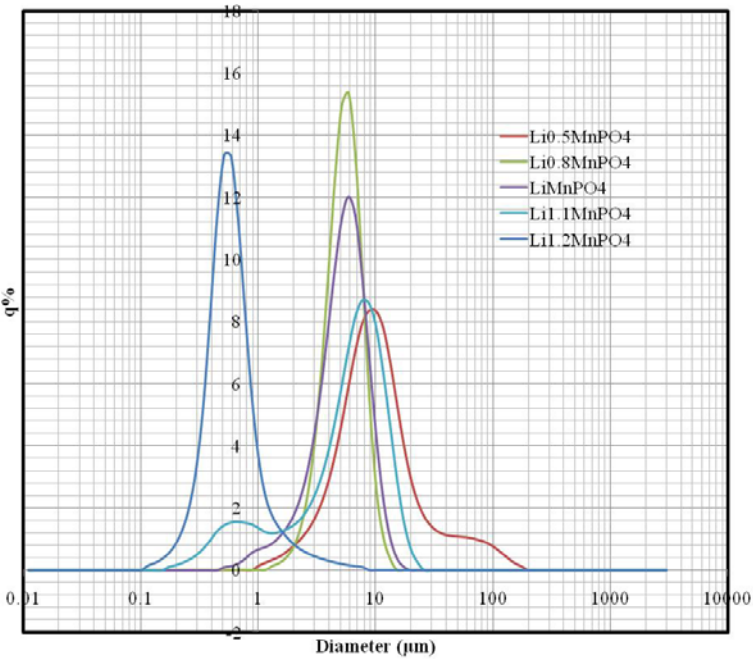

Figure S1. Particle size distribution of  $\text{Li}_x\text{MnPO}_4$  ( $0.5 \leq x \leq 1.2$ ).

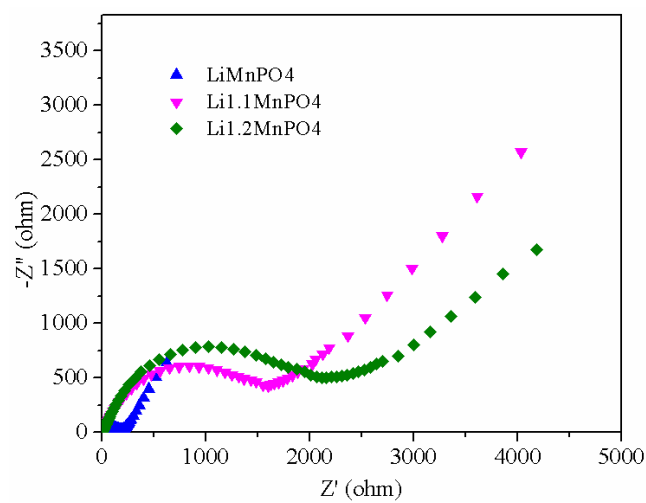

Figure S2. Comparison of the AC impedance of  $\text{LiMnPO}_4$ ,  $\text{Li}_{1.1}\text{MnPO}_4$  and  $\text{Li}_{1.2}\text{MnPO}_4$  after the first charge.
